# Supplementary material for: An angiogenesis‐related long noncoding RNA signature correlates with prognosis in patients with hepatocellular carcinoma
Source: PubMed Central journal article supplement (PMC8026853; doi:10.1042/bsr20204442), 2021-04-07

## Supplementary Materials

### Supplementary File S1: Identification of 123 angiogenesis-related genes.

---

gene

---

ARNT EIF1 EIF1AX EIF2B1 EIF2B2 EIF2B3 EIF2B4 EIF2B5 EIF2S1 EIF2S2  
EIF2S3 ELAVL1 FLT1 FLT4 HIF1A HRAS KDR NOS3 PIK3CA PIK3CG  
PIK3R1 PLCG1 PRKCA PRKCB SHC1 VEGFA VHL CARD10 DLL4 HDAC5  
ITGB1BP1 KLF4 MAP2K5 MEOX2 MIR146A MIR149 MIR15A MIR16-1  
MIR16-2 MIR188 MIR193A MIR196A1 MIR196A2 MIR199A1 MIR199A2  
MIR199B MIR19B1 MIR19B2 MIR200C MIR206 MIR20A MIR22 MIR221  
MIR2355 MIR26A1 MIR26A2 MIR29C MIR320A MIR329-1 MIR329-2  
MIR361 MIR410 MIR424 MIR483 MIR494 MIR495 MIR497 MIR503  
MMRN2 NOTCH1 PDCD10 RHOA SPRED1 STARD13 TBXA2R THBS1  
ACVRL1 AGGF1 AMOT ANG ANGPTL3 ANGPTL4 ATP5IF1 BTG1  
C1GALT1 CANX CDH13 CHRNA7 COL4A2 COL4A3 CXCL8 EGF EMCN  
EPGNERAP1 FOXO4 HTATIP2 IL17F IL18 MYH9 NCL NF1 NOTCH4 NPPB  
NPR1 PF4 PLG PML PROK2 RHOB RNH1 ROBO4 RUNX1 SCG2 SERPINF1  
SHH SPHK1 SPINK5 STAB1 TGFB2 THY1 TNFSF12 TNNT3 VEGFA

---

**Supplementary File S2: KM analysis of five lncRNAs. (A-E) Kaplan-Meier survival curve analysis shows the overall survival (OS) rates.**

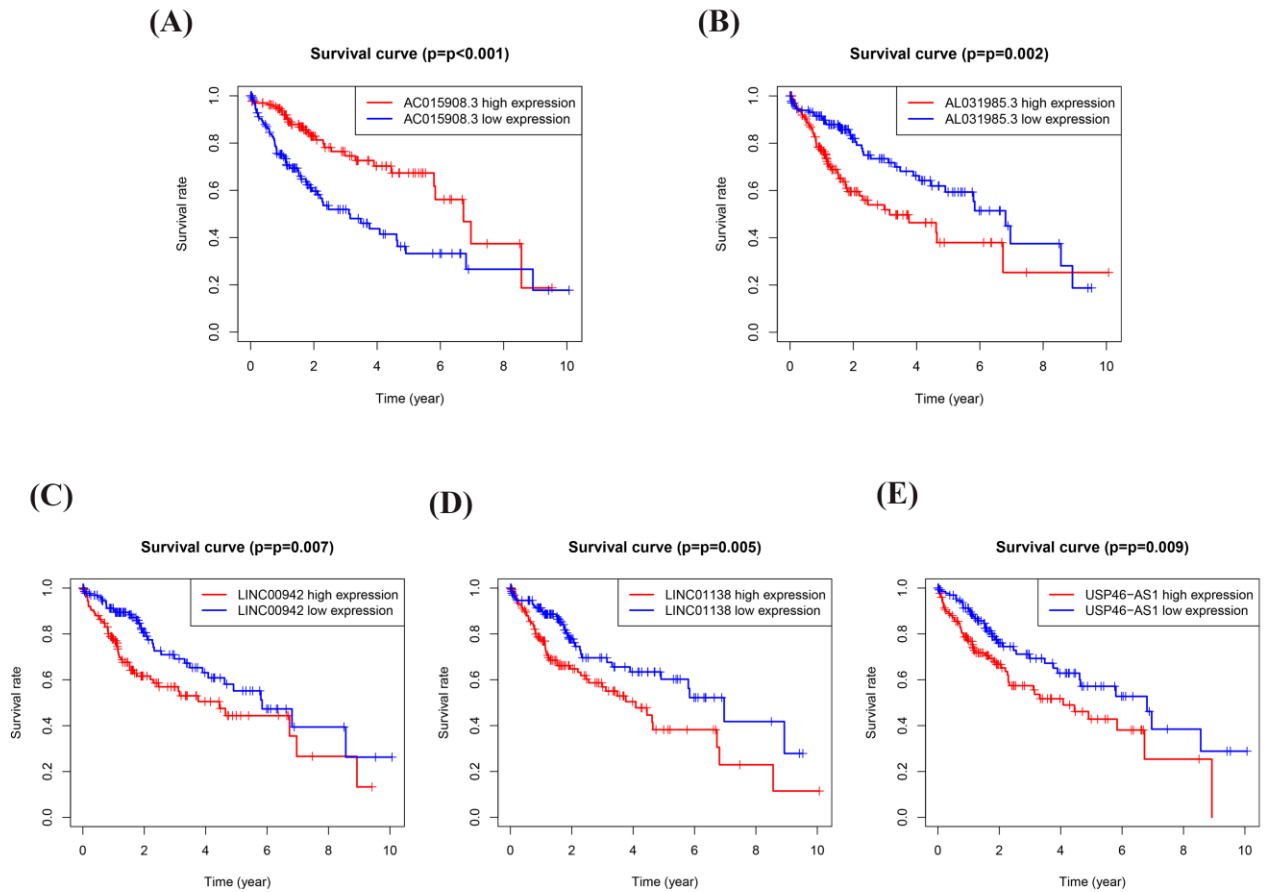

Supplement: BSR-2020-4442_supp.pdf [file BSR-2020-4442_supp.pdf]
